# Supplementary material for: Sensitive Electrochemical and Thermal Detection of Human Noroviruses Using Molecularly Imprinted Polymer Nanoparticles Generated against a Viral Target
Source: PubMed Central journal article supplement (PMC11440458; doi:10.1021/acsami.4c01942), 2024-09-12
Supplement: am4c01942_si_001.pdf [file am4c01942_si_001.pdf]

## Supporting Information

### **Sensitive Electrochemical and Thermal Detection of Human Noroviruses Using Molecularly Imprinted Polymer Nanoparticles Generated against a Viral Target**

*Sarbjeeet Kaur<sup>a,b</sup>, Pankaj Singla<sup>a,c</sup>, Amy J. Dann<sup>a,c</sup>, Jake McClements<sup>a</sup>, Mark V. Sullivan<sup>d</sup>, Minji Kim<sup>e</sup>, Sloane Stoufer<sup>e</sup>, James A. Dawson<sup>f</sup>, Robert D. Crapnell<sup>g</sup>, Craig E. Banks<sup>g</sup>, Nicholas W. Turner<sup>d</sup>, Matthew D. Moore<sup>e</sup>, Inderpreet Kaur<sup>b\*</sup>, Marloes Peeters<sup>a,c\*</sup>*

<sup>a</sup> School of Engineering, Merz Court, Claremont Road, Newcastle University, Newcastle Upon Tyne, NE1 7RU, United Kingdom

<sup>b</sup> Department of Chemistry, Centre for Advanced Studies, Guru Nanak Dev University, Amritsar, Punjab, 143005, India

<sup>c</sup> School of Engineering, Engineering A building, East Booth Street, University of Manchester, Manchester, M13 9QS, United Kingdom

<sup>d</sup> Department of Chemistry, Dainton Building, University of Sheffield, Sheffield, S3 7HF, United Kingdom

<sup>e</sup> Department of Food Science, University of Massachusetts, Amherst, MA 01003, United States

<sup>f</sup> Chemistry-School of Natural and Environmental Sciences, Newcastle University, Newcastle upon Tyne NE1 7RU, United Kingdom

<sup>g</sup> Manchester Metropolitan University, Faculty of Science and Engineering, John Dalton Building, Chester Steet, Manchester, M1 5GD, United Kingdom

#### **\*Corresponding authors:**

Marloes Peeters, Email: marloes.peeters@manchester.ac.uk

Inderpreet Kaur, Email: inderpreet11@yahoo.co.in

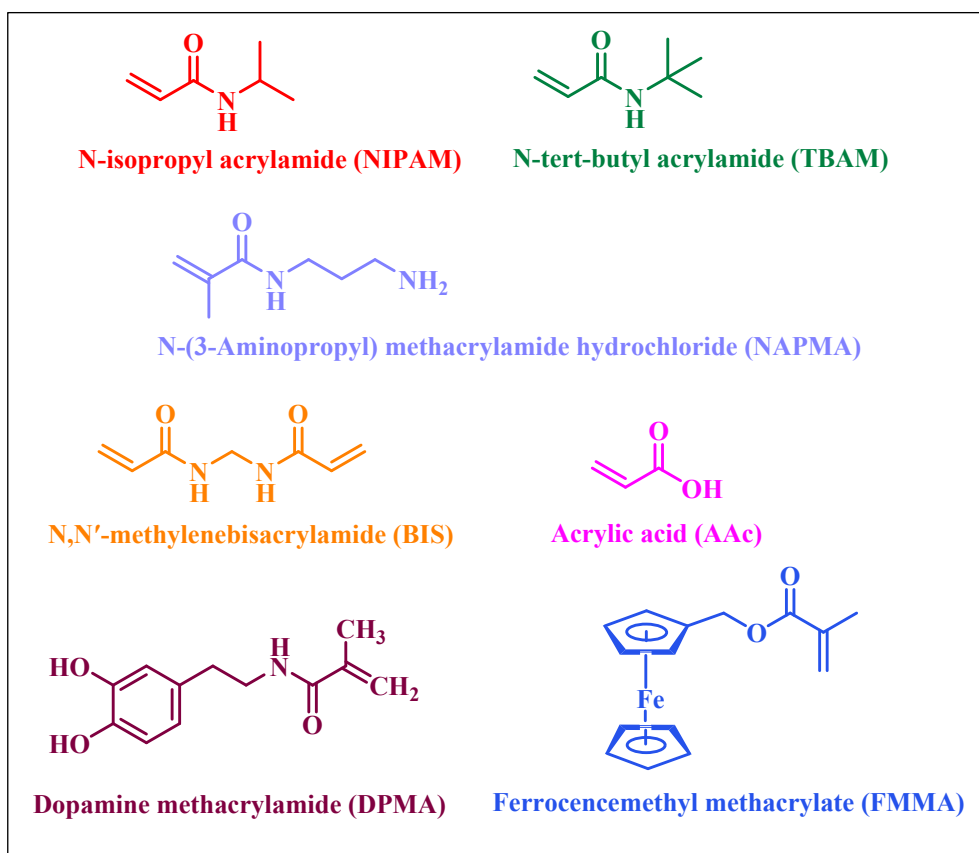

**Figure S1.** Molecular structures of different functional monomers used for the development of three nanoMIP types.

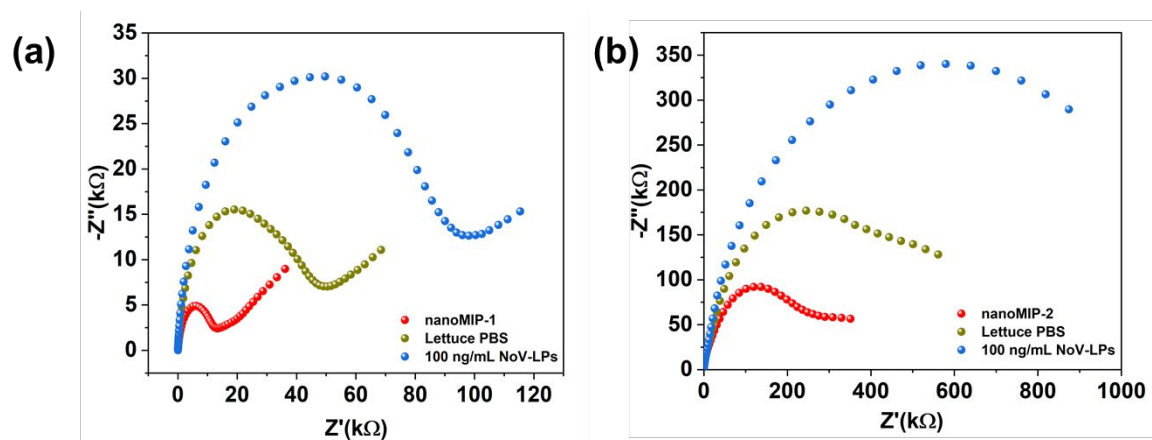

**Figure S2:** Nyquist plots for (a) GCE/4-ABA/EDC+NHS/nanoMIP-1 and (b) GCE/4-ABA/EDC+NHS/nanoMIP-2 with NoV-LP concentration of 100 ng/mL in romaine lettuce rinse water.

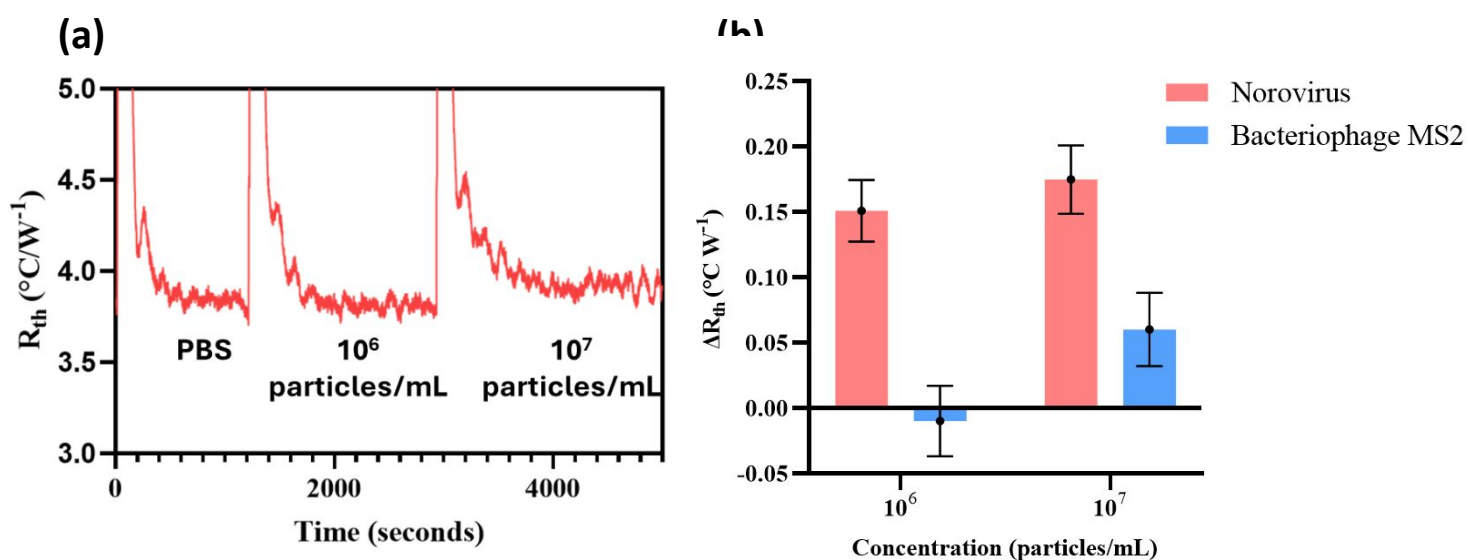

**Figure S3:** (a) Typical raw data showing the thermal detection of Bacteriophage MS2 ( $10^6$  and  $10^7$  particles/mL) using SPEs modified with nanoMIP-1; (b) Bar graph showing selectivity in terms of change in  $R_{th}$  with NoV and Bacteriophage MS2 concentrations ( $10^6$  and  $10^7$  particles/mL).

**Table S1:** Various concentrations of NoV-LPs used for electrochemical and thermal experiments.

| NoV-LPs Concentration | Number of NoV-LPs (particles/mL) | Number of NoV-LPs in 10 $\mu$ L sample for electrochemical experiments | Number of NoV-LPs in 100 $\mu$ L sample for thermal experiments |
|-----------------------|----------------------------------|------------------------------------------------------------------------|-----------------------------------------------------------------|
| 1 pg/mL               | $5.7 \times 10^4$                | $5.7 \times 10^2$                                                      | $5.7 \times 10^3$                                               |
| 10 pg/mL              | $5.7 \times 10^5$                | $5.7 \times 10^3$                                                      | $5.7 \times 10^4$                                               |
| 1000 pg/mL            | $5.7 \times 10^6$                | $5.7 \times 10^4$                                                      | $5.7 \times 10^5$                                               |
| 1 ng/mL               | $5.7 \times 10^7$                | $5.7 \times 10^5$                                                      | $5.7 \times 10^6$                                               |
| 10 ng/mL              | $5.7 \times 10^8$                | $5.7 \times 10^6$                                                      | $5.7 \times 10^7$                                               |
| 100 ng/mL             | $5.7 \times 10^9$                | $5.7 \times 10^7$                                                      | $5.7 \times 10^8$                                               |
| 1000 ng/mL            | $5.7 \times 10^{10}$             | -                                                                      | $5.7 \times 10^9$                                               |

**Table S2:** Strongest binding energies (kJ/mol) between monomers and epitope calculated using density functional theory.

| <b>Amino acid</b> | <b>NAPMA</b> | <b>FMMA</b> | <b>DPMA</b> |
|-------------------|--------------|-------------|-------------|
| D                 | -63.68       | -41.49      | -35.70      |
| E                 | -71.40       | -42.46      | -41.49      |
| Y                 | -65.61       | -57.89      | -62.72      |
| S                 | -105.17      | -101.32     | -100.35     |
| A                 | -101.31      | -116.75     | -96.49      |
| P                 | -66.58       | -52.11      | -49.21      |
| Q                 | -70.44       | -68.51      | -44.39      |
| V                 | -126.40      | -78.16      | -88.77      |

**Table S3:** Literature reports of NoV detection by various methods.

| <b>Method</b>                                               | <b>Technique</b>                 | <b>Target</b>                    | <b>LoD</b>              | <b>Reference</b> |
|-------------------------------------------------------------|----------------------------------|----------------------------------|-------------------------|------------------|
| NoV-LPs-specific antibody-conjugated carbon dots            | Fluorescence                     | NoV-LPs                          | 80.3 pg/mL              | 60               |
| Monoclonal antibody (mAb)                                   | Photoelectrochemical biosensor   | NoV-LPs                          | 0.2 ng/mL               | 61               |
| GII Ab-immunoassay                                          | Colorimetric                     | NoV-LPs                          | 10.8 pg/mL              | 62               |
| S domain protein-specific monoclonal antibody               | Electrochemical sensor           | NoV-LPs                          | 0.22 ng/ml              | 63               |
| Modified DNA aptamer                                        | Chemiluminescence                | Norovirus GII capsid recombinant | 80 ng/mL                | 64               |
| 3D-architected aptasensor                                   | Electrochemical sensor           | NoV-LPs                          | 0.28 ng/mL              | 65               |
| Norovirus-specific aptamer                                  | Fluorescence                     | NoV-LPs                          | 4.4 ng/mL and 3.3 ng/mL | 66               |
| Optical fibre                                               | Optical transmission             | NoV-LPs                          | 1 ng/mL                 | 67               |
| Quantum dot fluorescent dye                                 | SPR-assisted fluorescence sensor | NoV-LPs                          | 0.01 ng/mL              | 68               |
| Peroxidase-like graphene-gold nanoparticle hybrids          | Colorimetric                     | NoV-LPs                          | 92.7 pg/mL              | 58               |
| Biotinylated recombinant monoclonal anti-norovirus antibody | Electrochemical sensor           | NoV-LPs                          | 60 ag/mL                | 69               |
| Mouse anti-flavivirus group antigen monoclonal antibody     | Electrical biosensor             | NoV-LPs                          | 1.16 pg/mL              | 59               |
